# Supplementary material for: Thiocyanates as attractive redox-active electrolytes for high-energy and environmentally-friendly electrochemical capacitors
Source: Royal Society of Chemistry journal article supplement (doi:10.1039/c7cp00722a), 2017-01-01
Supplement: c7cp00722a1.pdf [file c7cp00722a1.pdf]

## Electronic Supplementary Information

### Thiocyanates as attractive redox-active electrolytes for high-energy and environmental-friendly electrochemical capacitors

Barbara Gorska, Paulina Bujewska, Krzysztof Fic

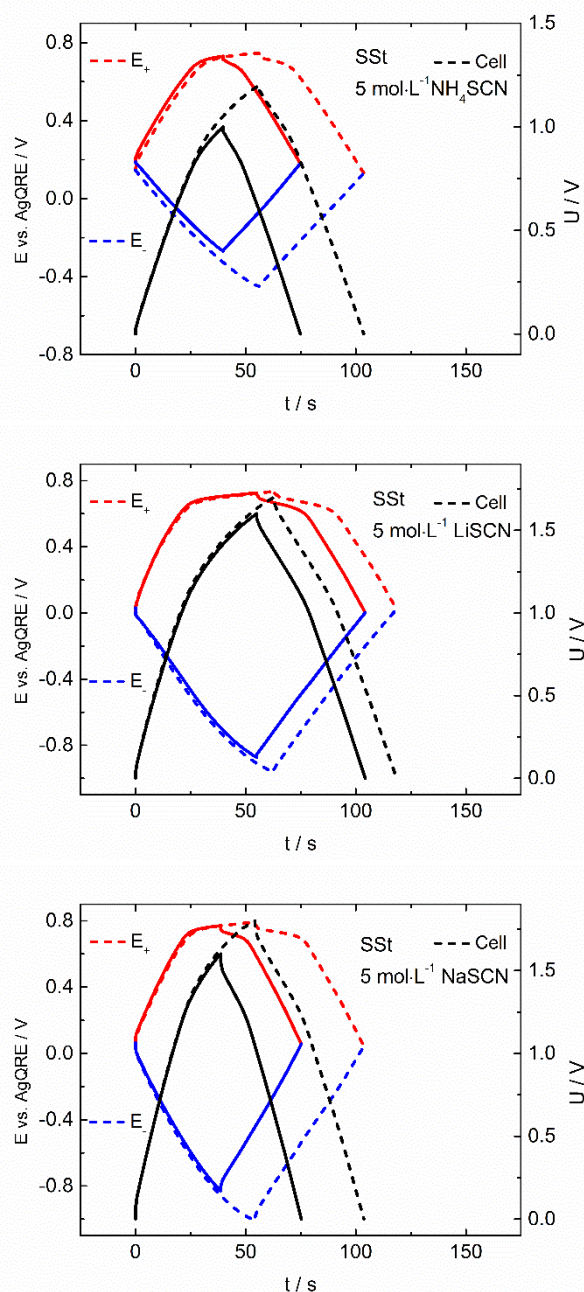

**ESI. Fig.1** Voltage profiles at 2 A·g<sup>-1</sup> of the a) 7 mol·L<sup>-1</sup> NH<sub>4</sub>SCN b) 5 mol·L<sup>-1</sup> LiSCN b) 5 mol·L<sup>-1</sup> NaSCN, systems and their positive and negative electrodes for a) 1.0 and 1.2 V, b) 1.6 and 1.7 V c) 1.6 and 1.8 V using S30/S30 electrodes.

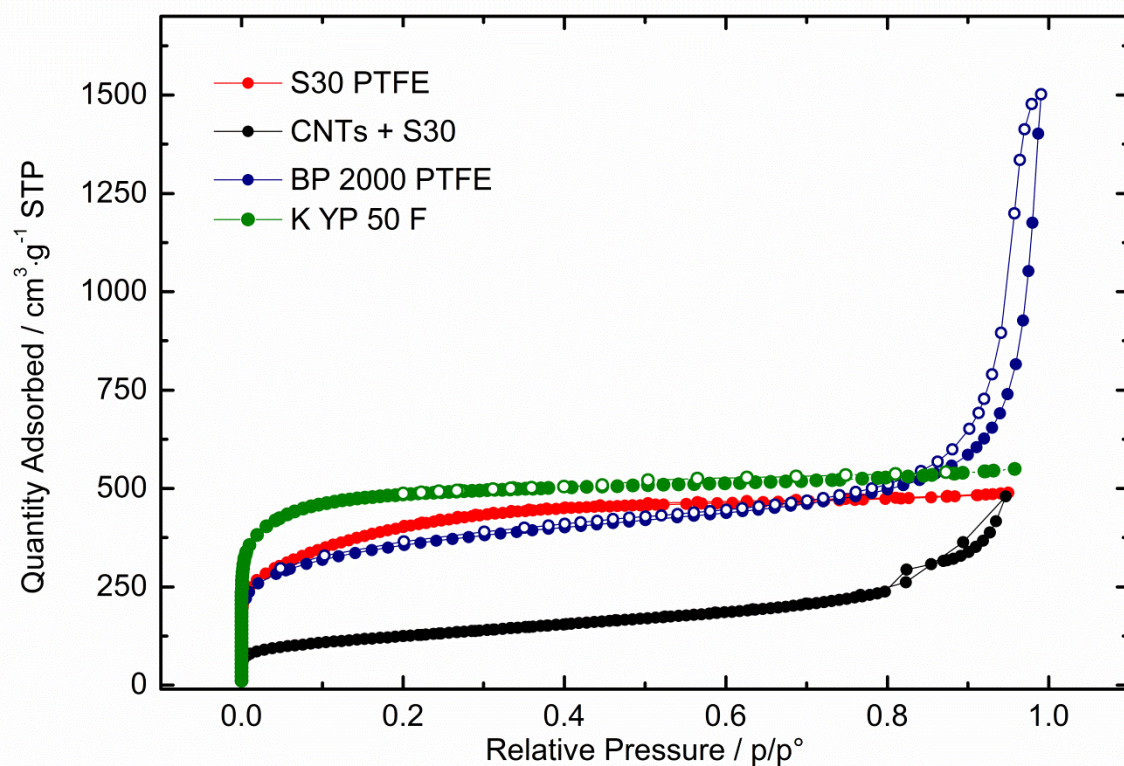

**ESI. Fig. 2** Nitrogen adsorption/desorption isotherms obtained at 77 K for the investigated electrodes.

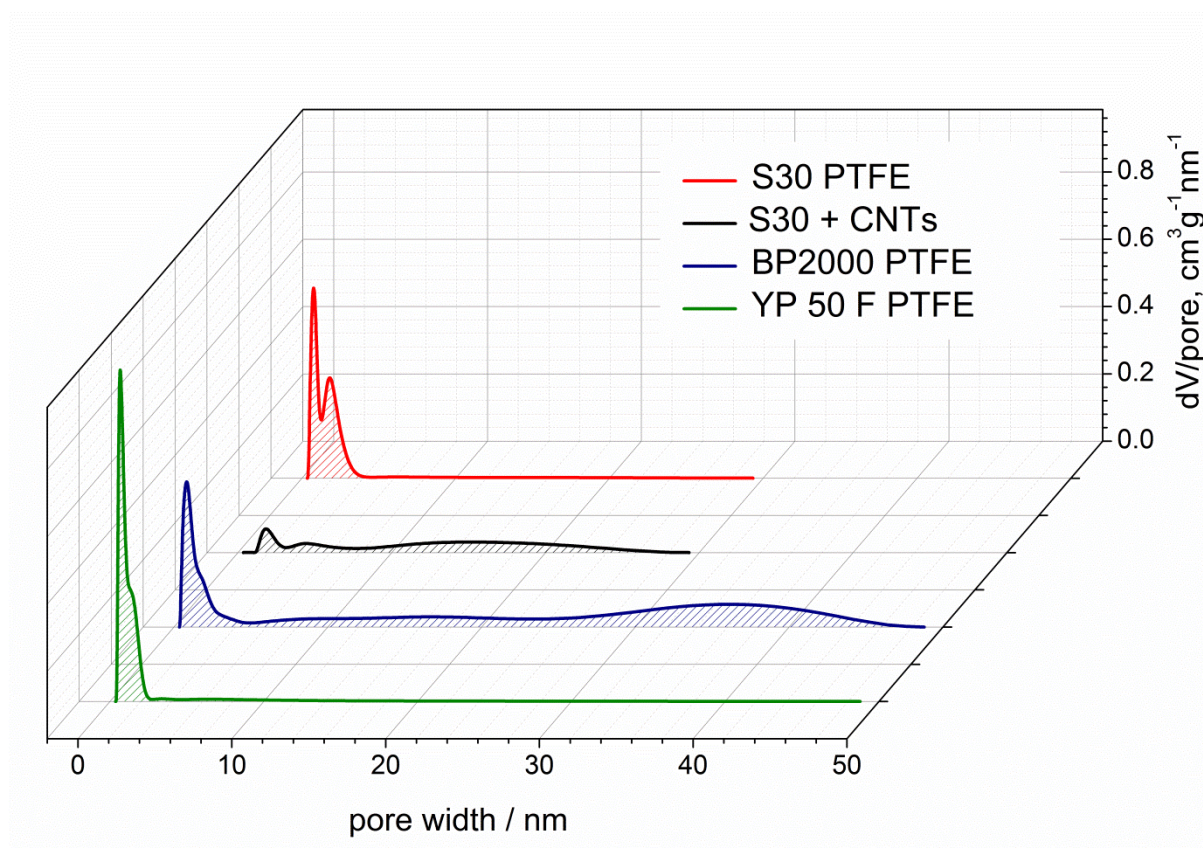

**ESI Fig. 3** Pore size distribution based on two-dimensional non-local density functional theory (2D-NLDFT).
